# Supplementary material
Source: publisher figshare collection journal article supplement (https://tandf.figshare.com/ndownloader/files/15129203)
Supplement: Supplementary file 1 [file 15129203]

---

## Supplementary material

### FW0622, a New Siderophore Isolated from Marine *Verrucosispora* sp. by Genome Mining

Wei Zhao <sup>a</sup>, Fei Peng <sup>b</sup>, Chuan-xi Wang<sup>c</sup>, Yang Xie <sup>a</sup>, Ru Lin <sup>a</sup>, Zhi-kai Fang <sup>a</sup>, Fei Sun<sup>a</sup>, Yun-yang Lian<sup>a</sup> and Jiang Hong<sup>a\*</sup>

<sup>a</sup>*Fujian Provincial Key Laboratory of Screening for Novel Microbial Products, Fujian Institute of Microbiology, Fuzhou 350007, P.R. China;* <sup>b</sup> *College of Pharmacy, Quanzhou Medical College, Quanzhou 362100, P.R. China;*

<sup>c</sup>*College of Pharmacy, Jinan University, Guangzhou 510632, P.R. China;*

Using the draft genome sequence of *Verrucosispora* sp. FIM060022, we have identified a new desferrioxamine-like siderophore, FW0622. This is the first chemically characterized siderophore obtained from *Verrucosispora*. The structure was elucidated by extensive spectral analyses. The biosynthetic pathway of FW0622 was proposed to be via the non-ribosomal peptide synthetase (NRPS)-independent (NIS) synthetase pathway based on the putative biosynthetic siderophore gene clusters in FIM060022. The results from this study demonstrate that marine-derived *Verrucosispora* species deserve recognition as an important source of new natural products. Furthermore, this study verified that genome mining is an effective way to thoroughly identify compounds that may be overlooked by traditional methods.

Key words: genome mining; siderophore; biosynthesis pathway; *Verrucosispora*.

## Experimental Section

### ***Draft genome sequence and analysis***

#### *Genome sequencing and assembly*

High quality genomic DNA from FIM060022 for sequencing was prepared with an EZ1 DNA Tissue Kit and a Bio Robot EZ1 (Qiagen). Shotgun and paired-end libraries were prepared and subsequently sequenced using next generation sequencing (NGS) technology using the Illumina Miseq (PE400) sequencing platform. The 2,845,130 high-quality reads and 632,396,458 bp were assembled using A5-Miseq (Coil D et al. 2015) to yield 29 scaffolds larger than 1,164 bp. The N50 was 453,524 bp.

### *Genome scan to identify biosynthetic gene cluster of secondary metabolism products*

The underlying biosynthesis gene clusters of secondary metabolism products in the strain FIM0600222 were predicted using antiSMASH and BLASTP searches against the NCBI nr databases for predicting function of proteins encoded in the siderophore biosynthetic gene cluster.

### ***Bioassay of antimicrobial activities***

The antimicrobial activities of compound FW0622 were evaluated by an agar dilution method (Zaika et al. 1988). The test strains included bacteria (*Staphylococcus aureus*, *Bacillus subtilis*, *Micrococcus luteus*, and *Escherichia coli*) and fungi (*Candida albicans* and *Aspergillus niger*). The minimum inhibitory concentration (MIC) values were defined as the lowest concentration at which no microbial growth was observed. The assays were run in triplicate.

### ***General experimental procedures***

Nuclear magnetic resonance (NMR) experiments were conducted on a Bruker Avance III spectrometer (400 MHz). Optical rotations were measured on a JASCO P1020 digital polarimeter. HR-ESI-MS (High Resolution Electrospray Ionization Mass Spectrometry) were recorded on an Aligent Quattro Premier Triple Quadrupole mass spectrometer and a Bruker MicroToF-QII mass spectrometer, respectively. Thin-layer chromatography (TLC) was carried out on silica gel GF254 (Qingdao Marine Chemical Ltd., China) plates. Column chromatography (CC) was carried out on silica gel (100-200 mesh; Qingdao Marine Chemical Ltd., China), Sephadex LH-20 (50 mm; Amersham Pharmacia Biotech, Sweden) and ODS (Octadecylsilyl) (60–80 mesh; YMC Ltd., Japan). All solvents used in TLC and CC analytical grade (Tianjin Damao Chemical Plant, Tianjin, China).

### ***Fermentation of *Verrucosispora* sp. FIM060022***

A fermentation experiment was conducted to isolate compound FW0622. To prepare seed inoculum, 1.0 ml of a thawed spore suspension was inoculated into a 500 ml Erlenmeyer flask containing 80 ml of seed medium consisting of 4.0% starch, 0.5% glucose, 0.5% peptone, 0.5% yeast extract, 0.05% (NH<sub>4</sub>)<sub>2</sub>SO<sub>4</sub>, 0.05%

NaCl, 0.05% K<sub>2</sub>HPO<sub>4</sub>, 0.05% MgSO<sub>4</sub> • 7H<sub>2</sub>O, and 0.1% CaCO<sub>3</sub> in distilled water (DI) at pH 7.5. After inoculation for 48 h at 32°C on a rotary shaker at 240 rpm, the mycelia suspension (5%) was transferred into 500 ml Erlenmeyer flasks, each containing 80 ml fermentation medium composed of 2.0% oatmeal, 0.2% peptone, 0.025% (NH<sub>4</sub>)<sub>2</sub>SO<sub>4</sub>, 0.025% NaCl, 0.1% CaCO<sub>3</sub>, and trace elements (0.1% FeSO<sub>4</sub> • 7H<sub>2</sub>O, 0.1% MnCl<sub>2</sub> • 4H<sub>2</sub>O, and 0.1% ZnSO<sub>4</sub> • 7H<sub>2</sub>O 1mL/L) in DI water at pH 7.5 for 120 h at 32°C on a rotary shaker 240 rpm.

### ***Extraction and isolation***

Culture broth was centrifuged to obtain mycelium, which was then soaked with methanol. The methanol solution was concentrated under vacuum to a dry residue, which was dissolved in H<sub>2</sub>O, forming a suspension. Subsequently, the mixture of the above suspension and the added supernatant was extracted repeatedly with ethyl acetate (Ea). The Ea layer was evaporated to dryness under vacuum yielding the crude sample (1.9 g), which was fractioned by silica gel CC using a CHCl<sub>3</sub>-MeOH gradient elution to obtain three fractions (F1-F3). The fraction F3 (0.28g) was subjected to Sephadex LH-20 CC and eluted with CHCl<sub>3</sub>: MeOH (1:1) in order to yield fractions (F3-1-F3-3). F3-3 was subjected to an ODS medium-pressure liquid chromatography with a gradient of MeOH in H<sub>2</sub>O (5-100% for 1 h with a flow rate of 2 mL/min). Fractions were evaporated to dryness (FW0622 12mg).

### **MS, IR and TLC figures**

FW0622: white amorphous powder; [ $\alpha$ ]<sub>D</sub><sup>20</sup> 4.0 (c 0.5, MeOH); UV (MeOH)  $\lambda_{\text{max}}$  (log  $\epsilon$ ) No maximum above 210; IR (neat)  $\nu_{\text{max}}$  3303, 3099, 3009, 2929, 2855, 1620, 1567, 1461, 1426, 1396, 732 cm<sup>-1</sup>; <sup>1</sup>H, <sup>13</sup>C NMR, and HMBC (Heteronuclear Multiple Bond Correlation) data see Table S1; HRESIMS m/z 513.3655 [M + H]<sup>+</sup> (calculated. for C<sub>26</sub>H<sub>48</sub>N<sub>4</sub>O<sub>6</sub>, 513.3652).

Mass spectrum

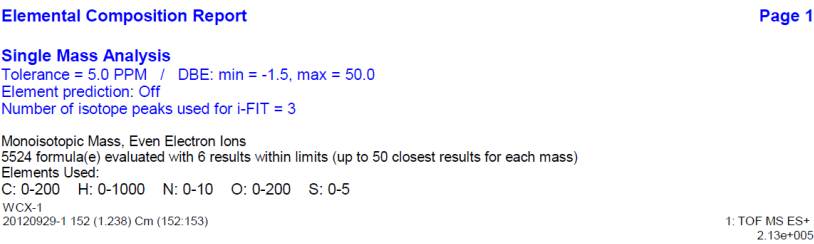

Figure S1 HRESI-MS spectrum of FW0622

IR spectrum

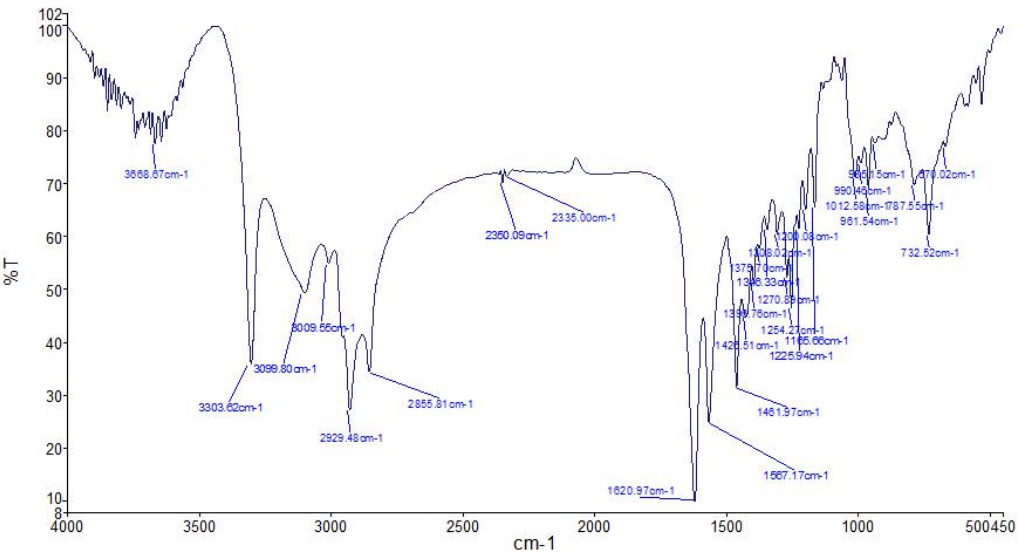

Figure S2 IR spectrum of FW0622

TLC figure

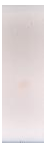

Figure S3 Reaction of hydroxamic acid iron with FW0622

## 1D, 2D NMR spectra of FW0622 and structural determination

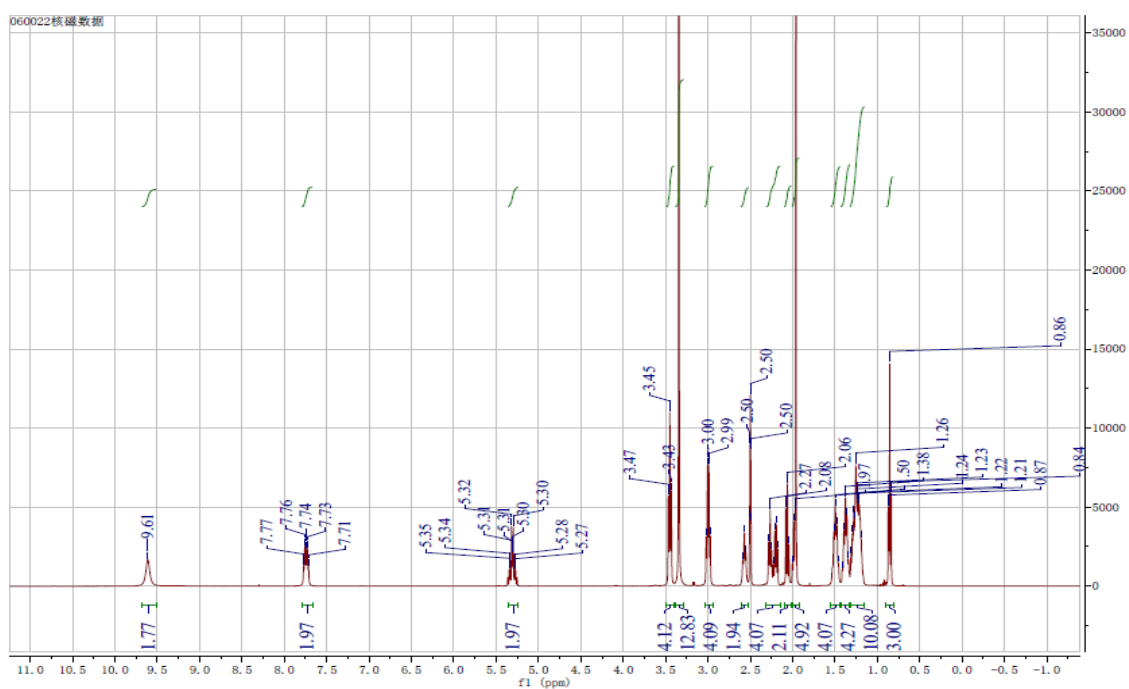

Figure S4 <sup>1</sup>H-NMR spectrum of FW0622 (400 MHz, DMSO-d<sub>6</sub>)

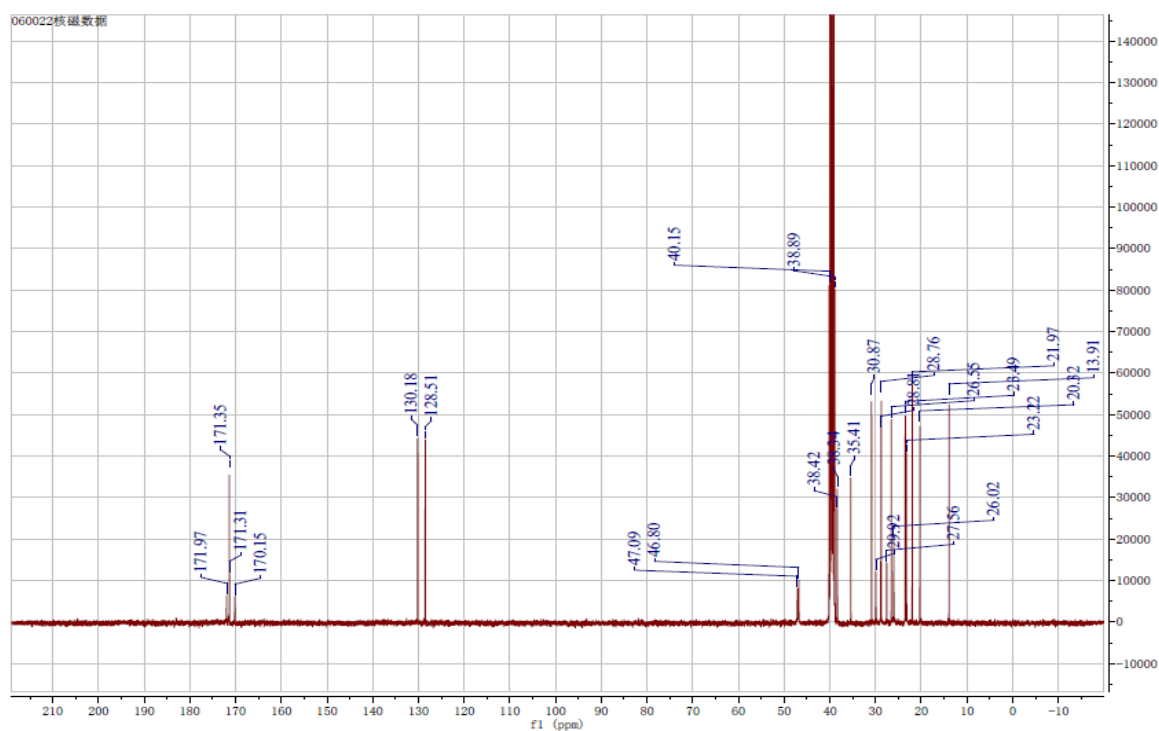

Figure S5 <sup>13</sup>C-NMR spectrum of FW0622 (100 MHz, DMSO-d<sub>6</sub>)

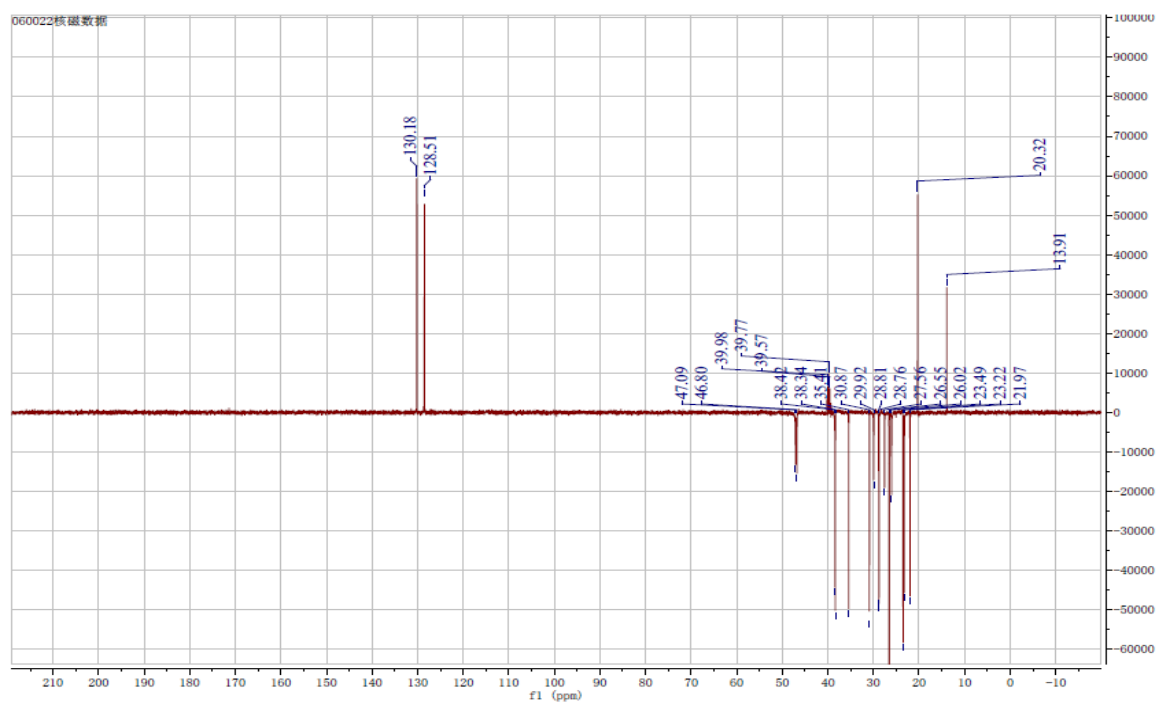

**Figure S6** DEPT135 spectrum of FW0622 (100 MHz, DMSO-d<sub>6</sub>)

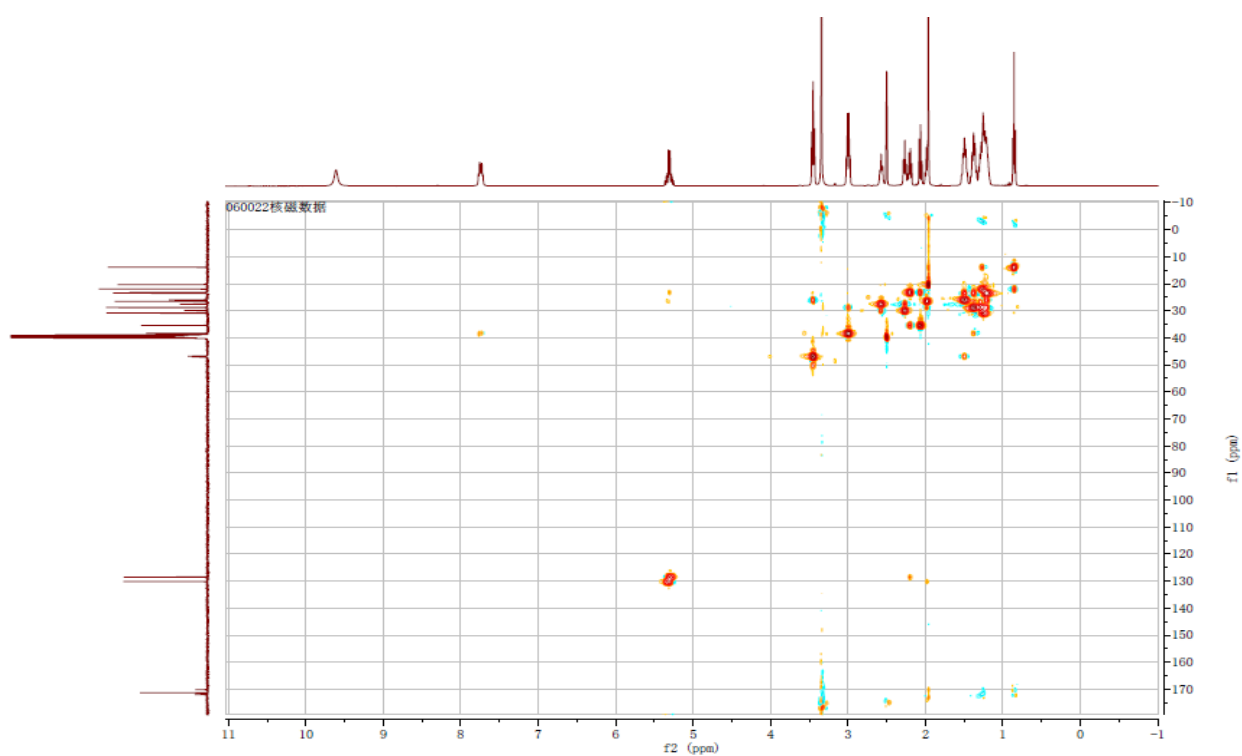

**Figure S7** HSQC spectrum of FW0622 (DMSO-d<sub>6</sub>)

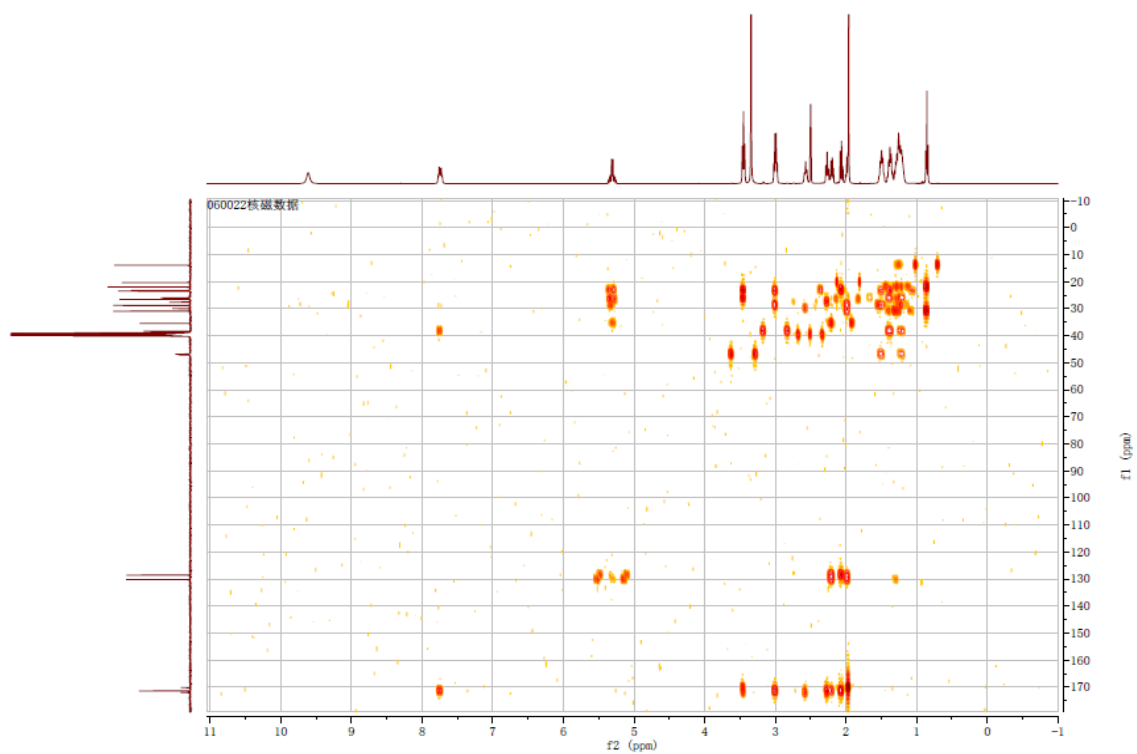

**Figure S8** HMBC spectrum of FW0622 (DMSO-d6)

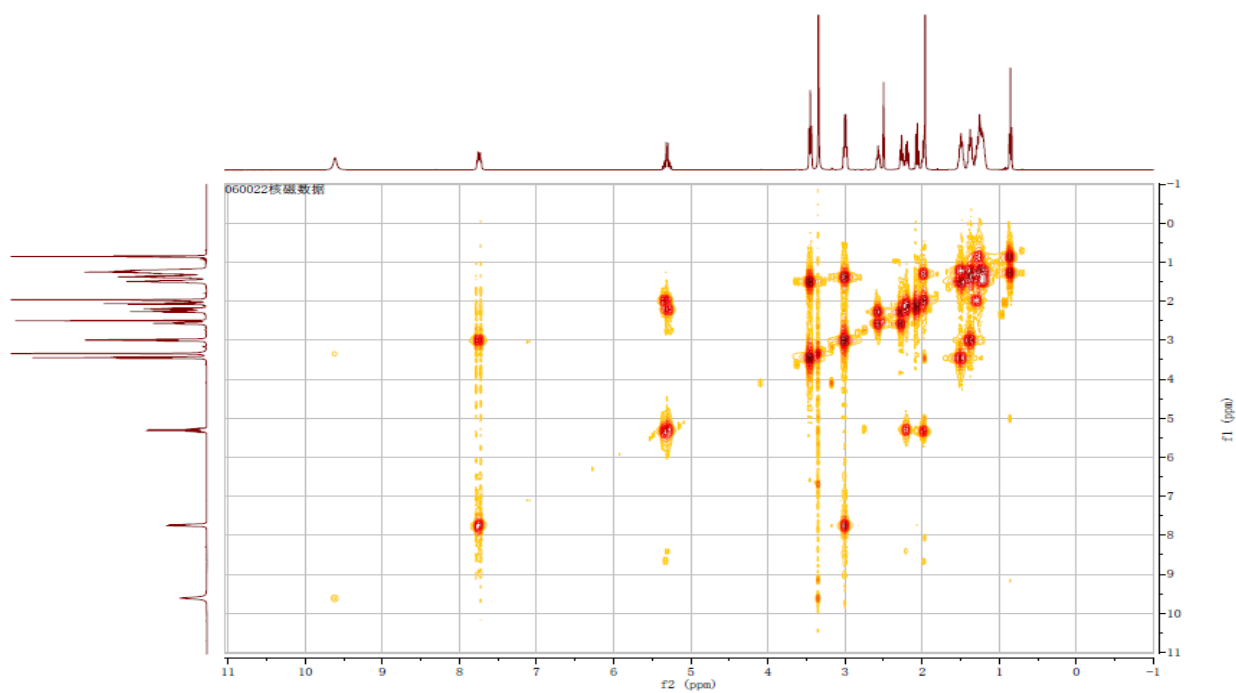

**Figure S9**  $^1\text{H}$ - $^1\text{H}$  COSY spectrum of FW0622 (DMSO-d6)

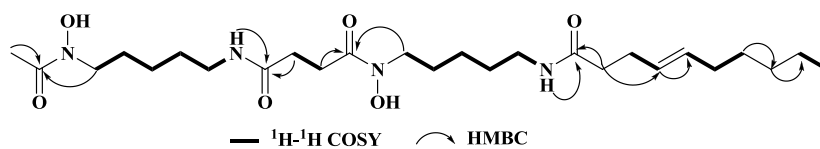

**Figure S10** Selected  $^1\text{H}$ - $^1\text{H}$  COSY and HMBC correlations of FW0622

# Display Report - All Windows Selected Analysis

**Analysis Name:** 13091201.d    **Instrument:** LC-MSD-Trip-SL    **Print Date:** 09/12/13 11:11:04  
**Method:** Copy of 1Start.MS    **Operator:** Administrator    **Acq. Date:** 09/12/13 08:49:17  
**Sample Name:** 512  
**Analysis Info:**

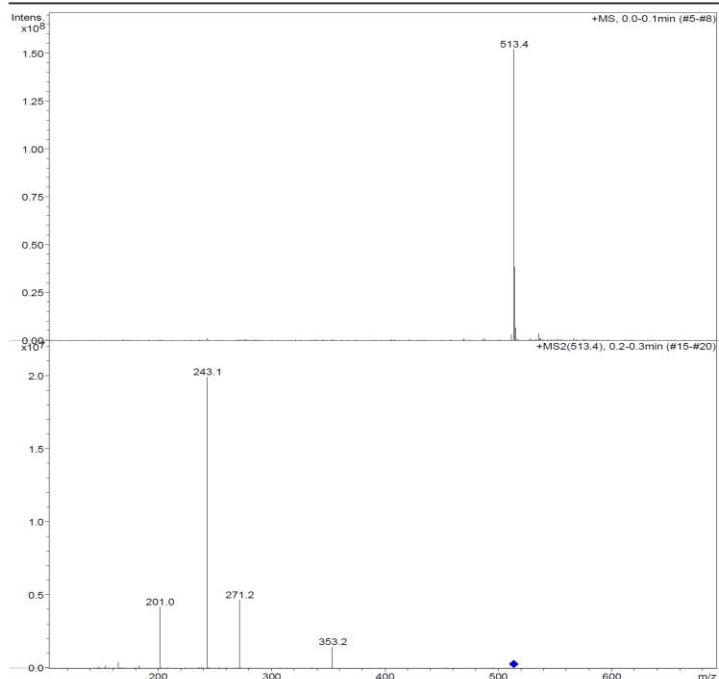

**Figure S11** FAB-MS/MS spectrum of FW0622

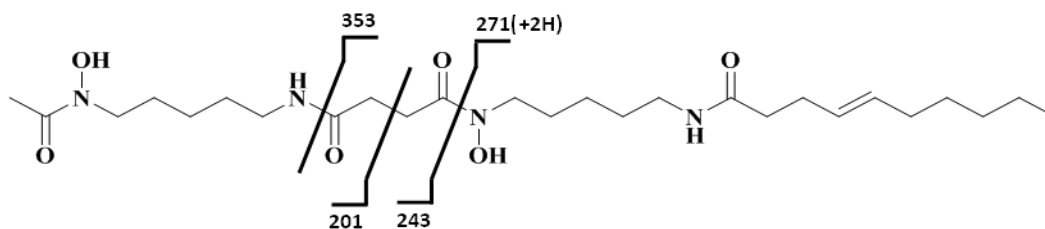

**Figure S12** FAB-MS/MS analysis of FW0622



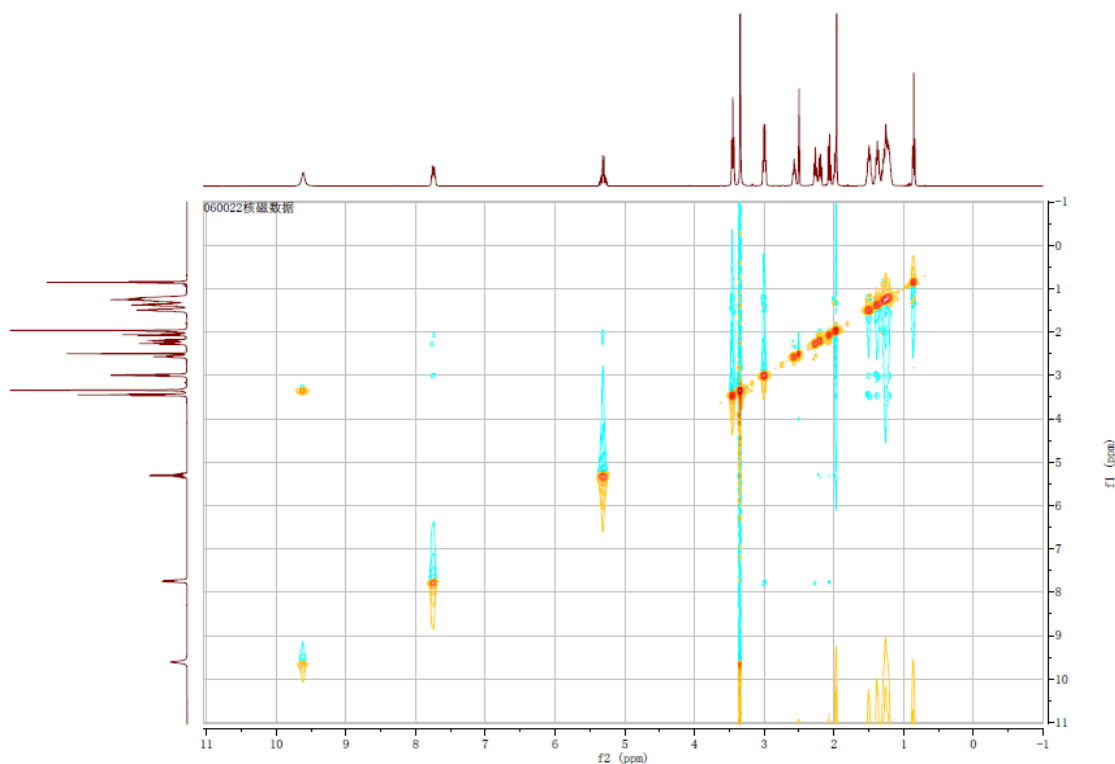

**Figure S13** NOESY (Nuclear Overhauser Effect Spectroscopy) spectrum of FW0622 (DMSO-d6)

#### Relative positions of putative functional genes in the siderophores biosynthetic gene clusters

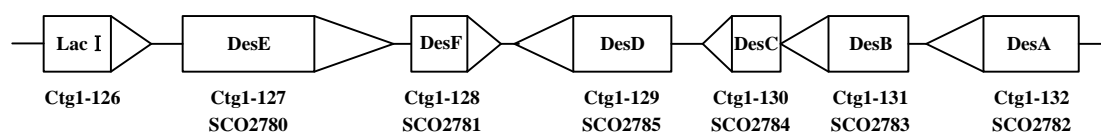

**Figure S14.** The relative position of enzymes within the desferrioxamine-like biosynthetic gene clusters

#### Genome sequencing and information

**Table S1** Gene clusters involved in biosynthesis of siderophores in *Verrucosipora* sp FIM060022

| Cluster name | Scaffold No. | Position (nt)   | MIBIG BGC-ID  | Gene cluster type | Most similar known cluster                                    |
|--------------|--------------|-----------------|---------------|-------------------|---------------------------------------------------------------|
| Cluster 5    | 1            | 1061600-1084200 | BGC0000551_c1 | Lantipeptide      | SapB biosynthetic gene cluster                                |
| Cluster 8    | 2            | 647671-688720   | BGC0001077_c1 | T3pks             | Alkyl-O-Dihydrogeranyl-Methoxyhydroquinones biosynthetic gene |
| Cluster 13   | 9            | 19193-40104     | BGC0001087_c4 | Terpene           | Sioxanthin biosynthetic gene cluster                          |
| Cluster 15   | 11           | 127607-139415   | BGC0000940_c1 | Siderophore       | Desferrioxamine B biosynthetic gene cluster                   |

|            |    |              |               |       |                                         |
|------------|----|--------------|---------------|-------|-----------------------------------------|
| Cluster 19 | 14 | 74679-108726 | BGC0001296_c1 | T1pks | Streptazone E biosynthetic gene cluster |
|------------|----|--------------|---------------|-------|-----------------------------------------|

**NMR data assignments and physicochemical properties of FW0622**

**Table S2** NMR data of FW0622 in DMSO-d6 (400 MHz for <sup>1</sup>H; 100 MHz for <sup>13</sup>C)

| No.  | Compound FW0622 |                          |                                     |                  |
|------|-----------------|--------------------------|-------------------------------------|------------------|
|      | δC (ppm)        | δH (ppm)                 | <sup>1</sup> H- <sup>1</sup> H COSY | HMBC (H→C)       |
| 1    | 20.3            | 1.97 (3H, s)             |                                     | C-2              |
| 2    | 170.1           | -                        |                                     |                  |
| 3-N  | -               | 9.62 (1H, s)             |                                     |                  |
| 4    | 46.8            | 3.46 (2H, t, J = 7.0 Hz) | H-5                                 | C-2, C-5, C-6    |
| 5    | 26.0            | 1.50 (2H, m)             | H-4, H-6                            | C-4, C-6, C-7    |
| 6    | 23.5            | 1.22 (2H, m)             | H-5                                 | C-4, C-5, C-8    |
| 7    | 28.8            | 1.38 (2H, m)             | H-8                                 | C-5, C-6, C-8    |
| 8    | 38.4            | 3.01 (2H, m)             | H-7, H-9                            | C-6, C-7, C-10   |
| 9-N  | -               | 7.73 (1H, m)             | H-8                                 | C-8, C-10        |
| 10   | 171.3           | -                        |                                     |                  |
| 11   | 29.9            | 2.27 (2H, t, J = 7.2 Hz) | H-12                                | C-10, C-12, C-13 |
| 12   | 27.6            | 2.58 (2H, t, J = 7.2 Hz) | H-11                                | C-10, C-11, C-13 |
| 13   | 172.0           | -                        |                                     |                  |
| 14-N | -               | 9.62 (1H, s)             |                                     |                  |
| 15   | 47.1            | 3.46 (2H, t, J = 7.0 Hz) | H-16                                | C-13, C-17, C-16 |
| 16   | 26.0            | 1.50 (2H, m)             | H-15, H-17                          | C-15, C-17, C-18 |
| 17   | 23.5            | 1.22 (2H, m)             | H-16                                | C-15, C-16, C-19 |
| 18   | 28.7            | 1.38 (2H, m)             | H-19                                | C-16, C-17, C-19 |
| 19   | 38.3            | 3.01 (2H, m)             | H-18, H-20                          | C-17, C-18, C-21 |
| 20-N | -               | 7.76 (1H, m)             | H-19                                | C-19, C-21       |
| 21   | 171.4           | -                        |                                     |                  |
| 22   | 35.4            | 2.07 (2H, t, J = 7.1 Hz) |                                     | C-21, C-24       |
| 23   | 23.2            | 2.20 (2H, m)             | H-24                                | C-21, C-24       |
| 24   | 128.5           | 5.31 (1H, m)             | H-23                                | C-22, C-23, C-25 |
| 25   | 130.2           | 5.32 (1H, m)             | H-26                                | C-24, C-26       |
| 26   | 26.5            | 1.98 (2H, m)             | H-25, H-27                          | C-25, C-27, C-28 |
| 27   | 29.2            | 1.30 (2H, m)             | H-26                                | C-25, C-28       |

|    |      |                          |      |            |
|----|------|--------------------------|------|------------|
| 28 | 30.8 | 1.26 (2H, m)             |      | C-29       |
| 29 | 21.9 | 1.27 (2H, m)             | H-30 | C-30       |
| 30 | 13.9 | 0.86 (3H, t, J = 7.1 Hz) | H-29 | C-28, C-29 |

**Table S3** Physicochemical properties of compound FW0622

| Content                                    | Compound 1                                                        |
|--------------------------------------------|-------------------------------------------------------------------|
| Appearance                                 | White amorphous powder                                            |
| Melting point                              | 143.3-145.4 °C                                                    |
| Molecular formula                          | C <sub>26</sub> H <sub>48</sub> N <sub>4</sub> O <sub>6</sub>     |
| HRFAB-MS(m/z)                              | Calc. mass: 513.3652                                              |
| (M+H) <sup>+</sup>                         | Found mass: 513.3655                                              |
| UV λ <sub>max</sub> nm                     | No maximum above 210                                              |
| IR ν <sub>max</sub> (KBr) cm <sup>-1</sup> | 3303, 3099, 3009, 2929, 2855<br>1620, 1567, 1461, 1426, 1396, 732 |
| Optical rotation                           | [α] <sub>20</sub> D 4.0 (c 0.5, MeOH)                             |

**Table S4.** Open reading frames in the desferrioxamine-like biosynthetic gene cluster of *Verrucosispora* sp.  
FIM060022

| ORF<br>(locus<br>tag) | Size<br>(aa) | Deduced<br>function | Position(nt)  | Protein homolog                                        | <i>Verrucosispora</i> |                     |
|-----------------------|--------------|---------------------|---------------|--------------------------------------------------------|-----------------------|---------------------|
|                       |              |                     |               |                                                        | Identity<br>(%)       | Accession<br>number |
| Ctg1-126              | 338          |                     | 127790-128806 | Lac I family transcription<br>regulator                | 99                    | AEB45158.1          |
| Ctg1-127              | 900          | DesE                | 128851-131553 | Secreted Protein<br>(iron compound ABC<br>transporter) | 95                    | WP_013733812.1      |
| Ctg1-128              | 255          | DesF                | 131590-132600 | aminoglycoside<br>phosphotransferase family<br>protein | 95                    | WP_013733811.1      |
| Ctg1-129              | 602          | DesD                | 132607-134415 | lucA/lucC family siderophore<br>biosynthesis protein   | 95                    | WP_013733808.1      |
| Ctg1-130              | 192          | DesC                | 134412-134490 | Siderophore biosynthesis<br>N-acyltransferase protein  | 93                    | WP_013733807.1      |
| Ctg1-131              | 426          | DesB                | 134987-136267 | lysine<br>6-monooxygenase(NADPH)                       | 98                    | WP_013733806.1      |
| Ctg1-132              | 507          | DesA                | 136303-137826 | pyridoxal-dependent<br>decarboxylase                   | 96                    | WP_013733805.1      |

## References

Coil D, Jospin G, Darling AE. 2015. A5-miseq: an updated pipeline to assemble microbial genomes from Illumina MiSeq data. *Bioinformatics*. 31(4):587-9.

Zaika LL. 1988. Spices and herbs: their antimicrobial activity and its determination. *J. Food Safety*. 9: 97–118.

## Figure captions:

Figure S1. HRESI-MS spectrum of FW0622

Figure S2. IR spectrum of FW0622

Figure S3. Reaction of hydroxamic acid iron with FW0622

Figure S4.  $^1\text{H}$ -NMR spectrum of FW0622 (400 MHz, DMSO- $d_6$ )

Figure S5.  $^{13}\text{C}$ -NMR spectrum of FW0622 (100 MHz, DMSO- $d_6$ )

Figure S6. DEPT135 spectrum of FW0622 (100 MHz, DMSO- $d_6$ )

Figure S7. HSQC spectrum of FW0622 (DMSO- $d_6$ )

Figure S8. HMBC spectrum of FW0622 (DMSO- $d_6$ )

Figure S9.  $^1\text{H}$ - $^1\text{H}$  COSY spectrum of FW0622 (DMSO- $d_6$ )

Figure S10. Selected  $^1\text{H}$ - $^1\text{H}$  COSY and HMBC correlations of FW0622

Figure S11 FAB-MS/MS spectrum of FW0622

Figure S12 FAB-MS/MS analysis of FW0622

Figure S13 NOESY spectrum of FW0622 (DMSO- $d_6$ )

Figure S14 The relative position of enzymes within the desferrioxamine-like biosynthetic gene clusters

## Table Captions:

Table S1. Gene clusters involved in biosynthesis of siderophores in *Verrucosispora sp* FIM060022

Table S2. NMR data of FW0622 in DMSO- $d_6$  (400 MHz for  $^1\text{H}$ ; 100 MHz for  $^{13}\text{C}$ )

Table S3. Physicochemical properties of compound FW0622

Table S4. Open reading frames in the desferrioxamine-like biosynthetic gene cluster of *Verrucosispora sp*. FIM060022
